# Supplementary material for: Subthreshold IKK activation modulates the effector functions of primary mast cells and allows specific targeting of transformed mast cells
Source: PubMed Central journal article supplement (PMC4467154; doi:10.18632/oncotarget.3022), 2015-02-27
Supplement: oncotarget-06-5354-s001.pdf [file oncotarget-06-5354-s001.pdf]

SUPPLEMENTARY FIGURES

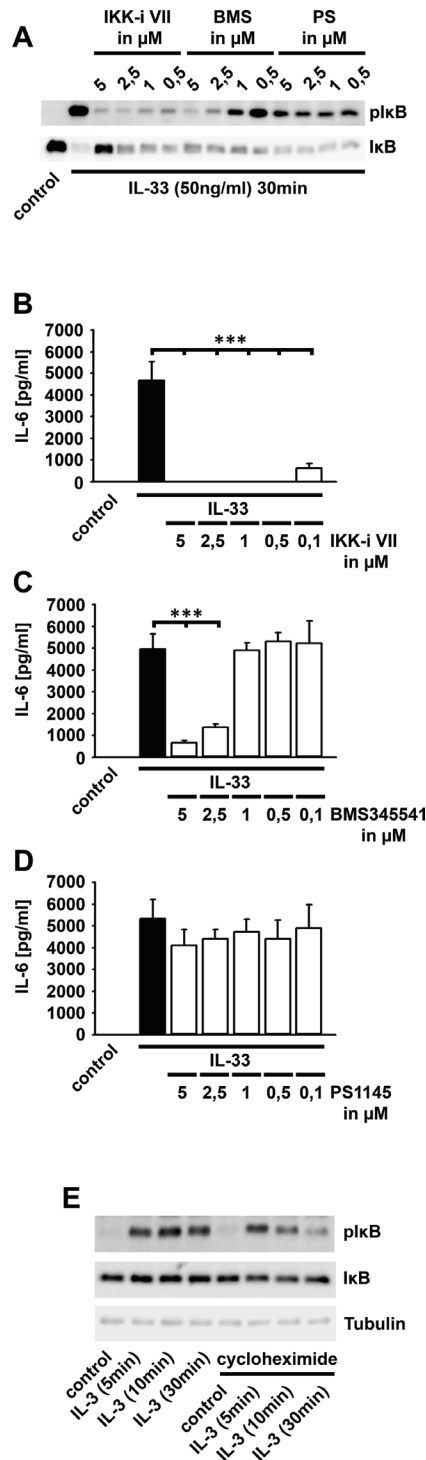

**Supplementary Figure S1: The IKK inhibitor VII is the most potent IKK inhibitor.** (A–D) BMDCs were pre-treated with different IKK inhibitors (as indicated) and stimulated with IL-33. Lysates were analyzed by western blotting (A) or supernatants were collected and analyzed for IL-6 (B–D) ( $p < 0,001$ ). (E) BMDCs were treated with cycloheximide (340  $\mu\text{M}$ ) and stimulated with IL-3. Lysates were analyzed by western blotting.

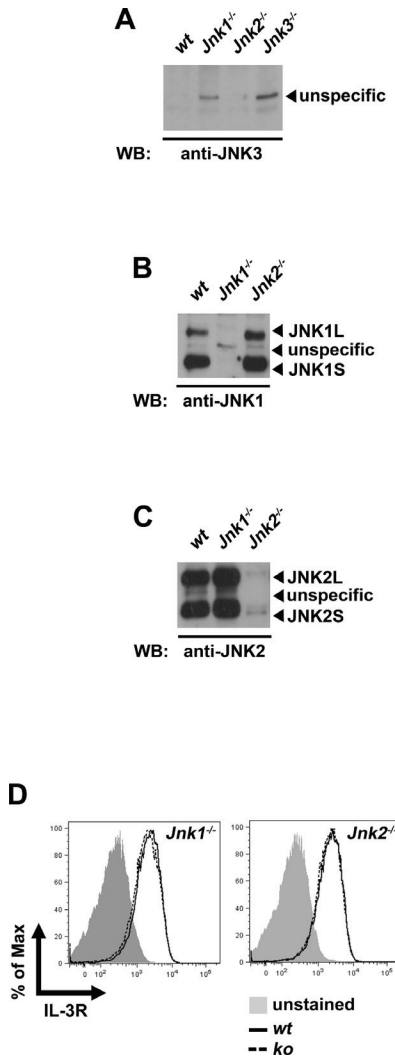

**Supplementary Figure S2: IKK2 mediates JNK-dependent mitogenic signaling.** (A–C) *Jnk1*<sup>-/-</sup>, *Jnk2*<sup>-/-</sup> and *Jnk3*<sup>-/-</sup> BMMCs were lysed and analyzed for the expression of JNK isoforms by western blotting. (D) *Jnk1*<sup>-/-</sup> and *Jnk2*<sup>-/-</sup> BMMCs were analyzed for IL-3R $\alpha$  expression by flow cytometry.

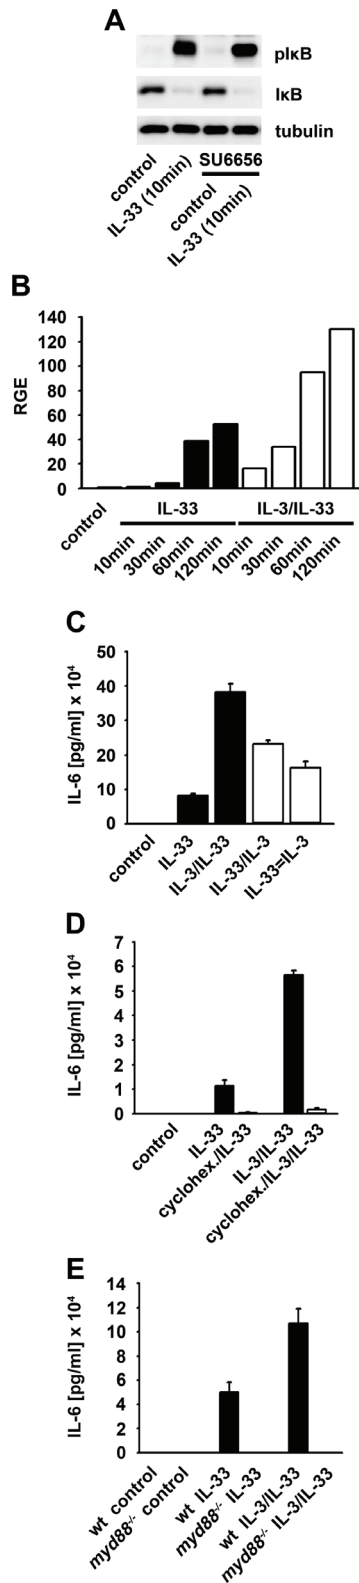

**Supplementary Figure S3: The cytokine production depends on *de novo* protein-biosynthesis.** (A) BMMCs were pre-treated with SU6656 and stimulated with IL-33. Lysates were analyzed by western blotting. (B) BMMCs were single stimulated with IL-33 or IL-33 in combination with IL-3. Total RNA was isolated, reverse transcribed and analyzed for the presence of IL-6 mRNA. (C) BMMCs were single stimulated with IL-33 or were sequentially (pre-stimulation with IL-3 for 30min: IL-3/IL-33 or pre-stimulation with IL-33: IL-33/IL-3) or simultaneously (IL-33=IL-3) stimulated. Supernatants were collected and analyzed for IL-6. (D, E) Cycloheximide-treated- (D), wt or *Myd88*<sup>-/-</sup> (E) BMMCs were single stimulated with IL-33 or IL-33 in combination with IL-3. Supernatants were collected and analyzed for IL-6.

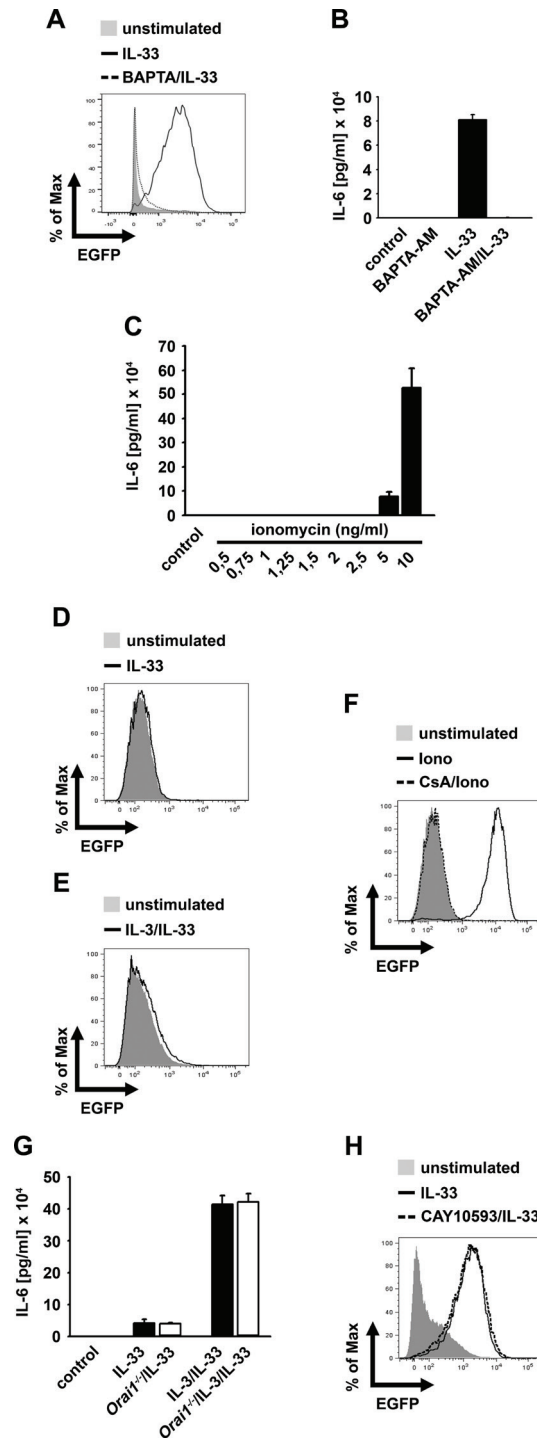

**Supplementary Figure S4: The IL-33- or IL-3/IL-33-induced cytokine production depends on Ca<sup>2+</sup>.** (A, B) NFκB-EGFP-MC/9 cells were pre-incubated with BAPTA-AM and stimulated with IL-33. Cells were analyzed for EGFP-production by flow cytometry (A) or supernatants were collected and analyzed for IL-6 (B). (C) BMMCs were treated with different ionomycin concentrations. Supernatants were collected and analyzed for IL-6 production. (D–F) NFκB-EGFP-MC/9 cells were stimulated with IL-33, (D) IL-33 in combination with IL-3 (E) or were pre-treated with BAPTA-AM and stimulated with ionomycin (F). Cells were analyzed for EGFP production by flow cytometry (D–F). (G) Wt or *Orail*<sup>-/-</sup> BMMCs were stimulated with IL-33 or IL-33 in combination with IL-3. Supernatants were collected and analyzed for IL-6. (H) NFκB-EGFP-MC/9 were pre-treated with the PLD1 inhibitor Cay10593 and stimulated with IL-33. Supernatant were analyzed for IL-6.
